# Supplementary material for: Inhibitory Effects of Culinary Herbs and Spices on the Growth of HCA-7 Colorectal Cancer Cells and Their COX-2 Expression
Source: MDPI journal article supplement (doi:10.3390/nu9101051), 2017-09-21
Supplement: s1 [file s1]

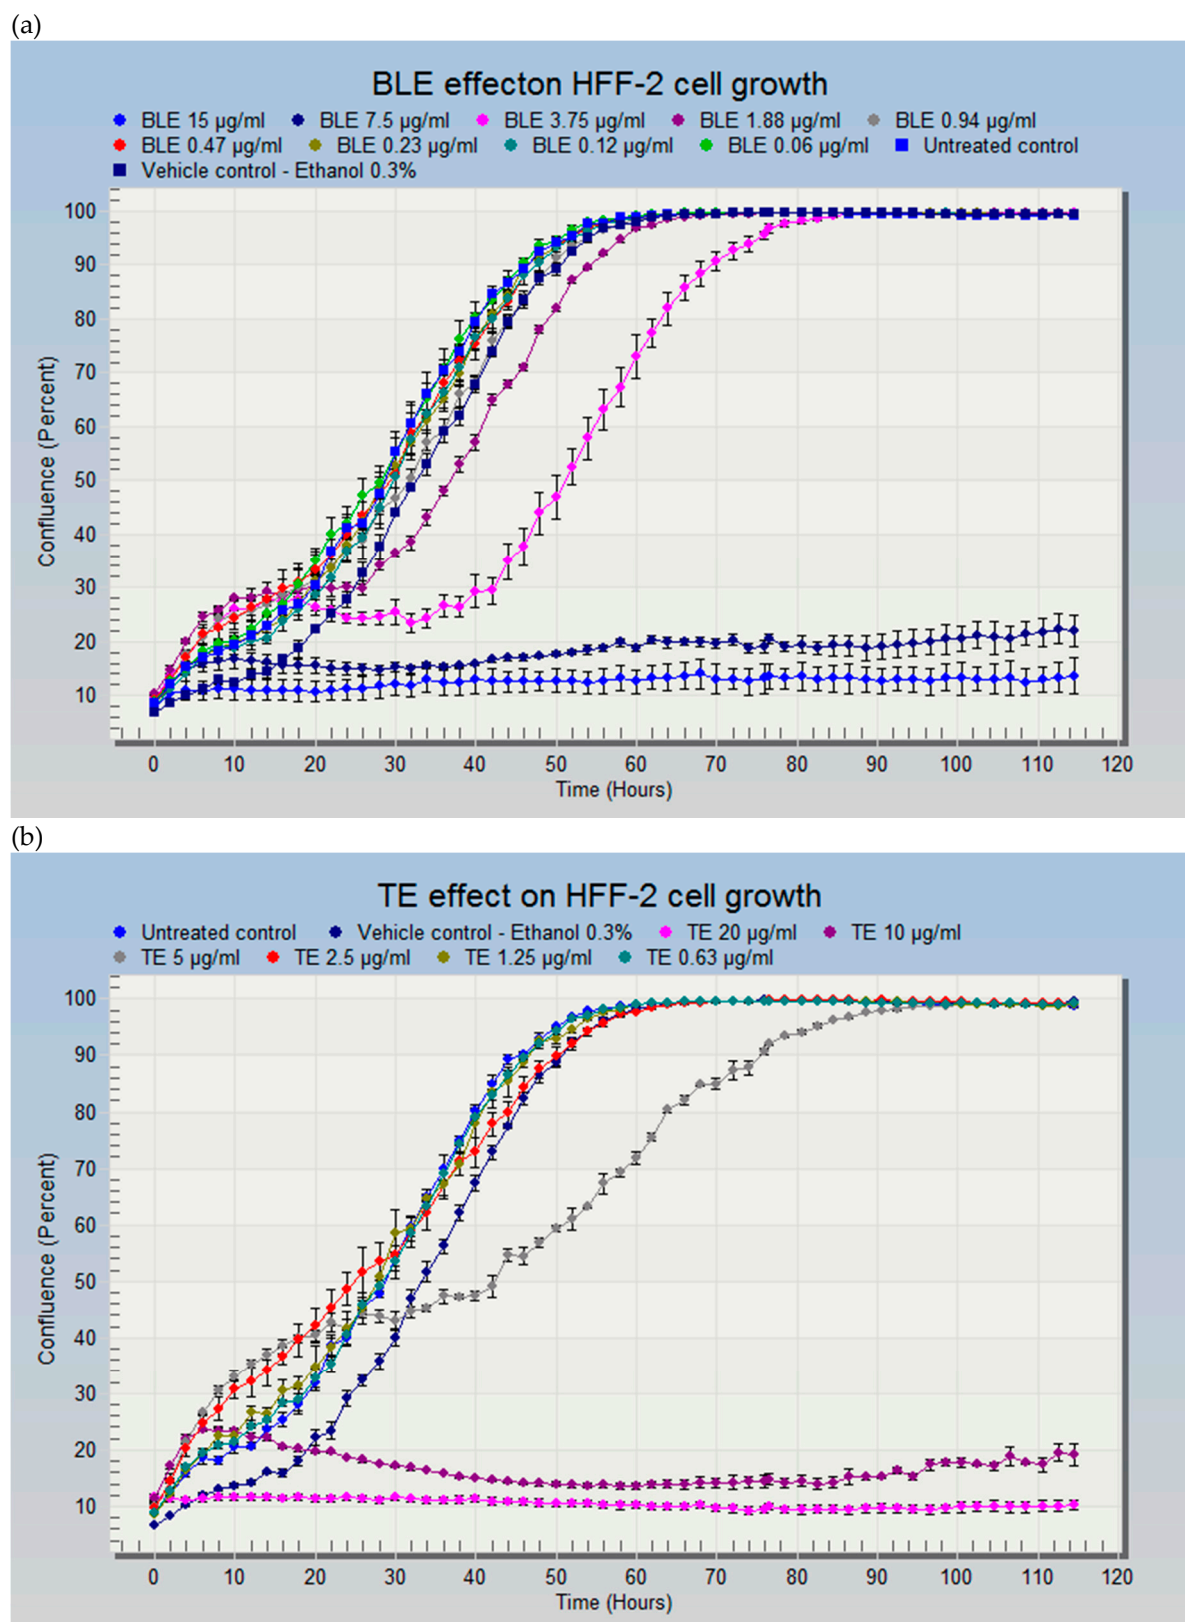

**Figure S1. (a) BLE effect on HFF-2 cell growth. (b) TE effect on HFF-2 cell growth.** Cells were treated with a range of concentrations and the growth was monitored using IncuCyte camera. Data were analysed and presented using IncuCyte software (Essen Bioscience, UK).

(a)

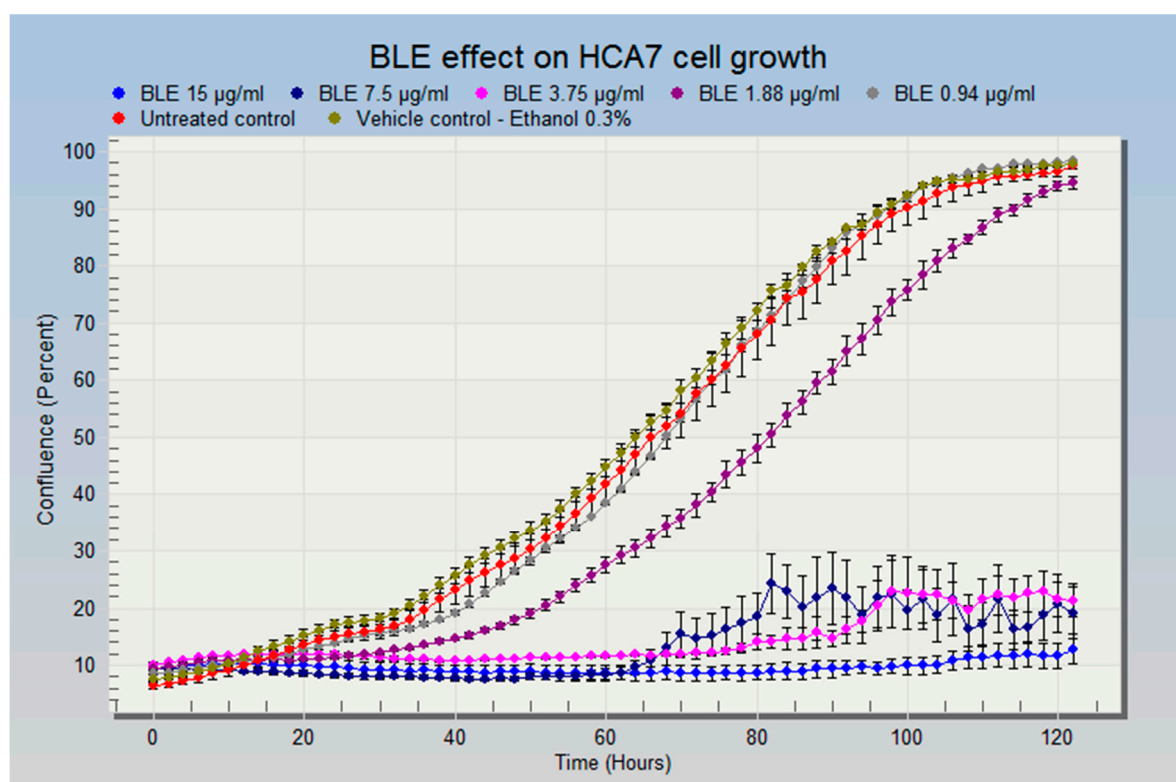

(b)

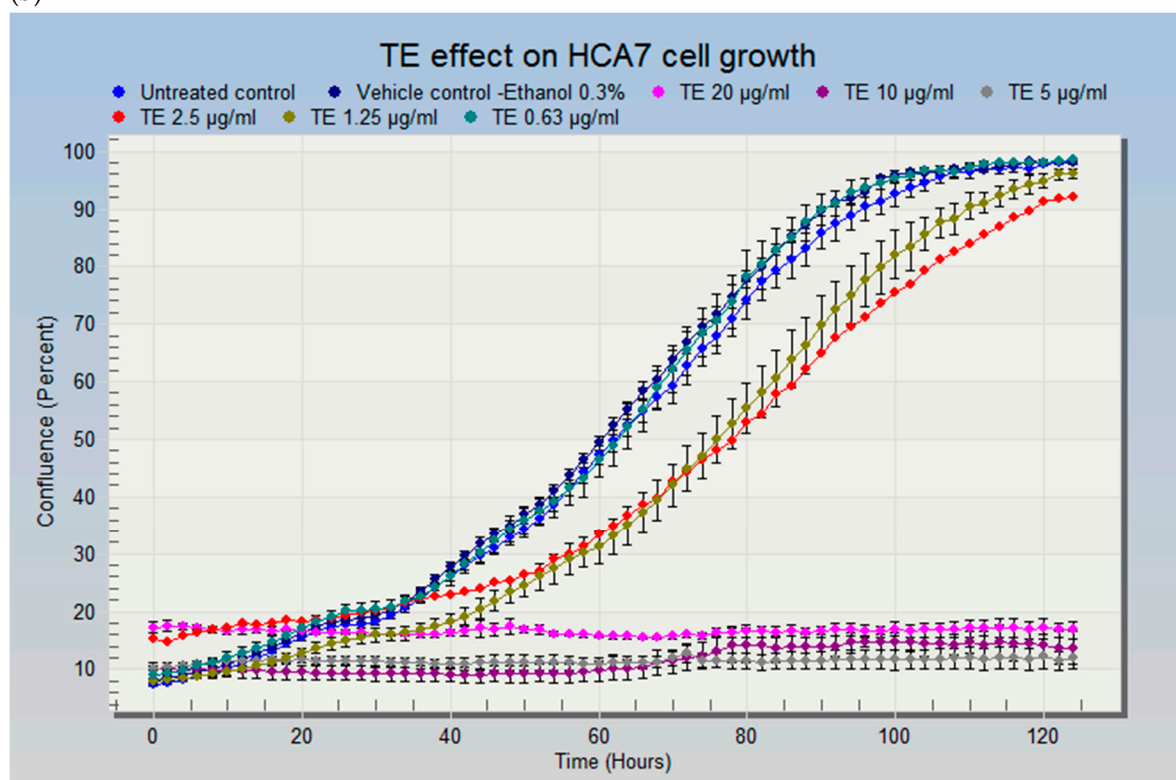

**Figure S2.** (a) BLE effect on HCA-7 cell growth. (b) TE effect on HCA-7 cell growth. Cells were treated with a range of concentrations and the growth was monitored using IncuCyte camera. Data were analysed and presented using IncuCyte software (Essen Bioscience, UK).
